# Supplementary material for: The evolutionary path of chemosensory and flagellar macromolecular machines in Campylobacterota
Source: PubMed Central journal article supplement (PMC9321776; doi:10.1371/journal.pgen.1010316), 2022-07-14
Supplement: pgen.1010316.s002.pdf [file pgen.1010316.s002.pdf]

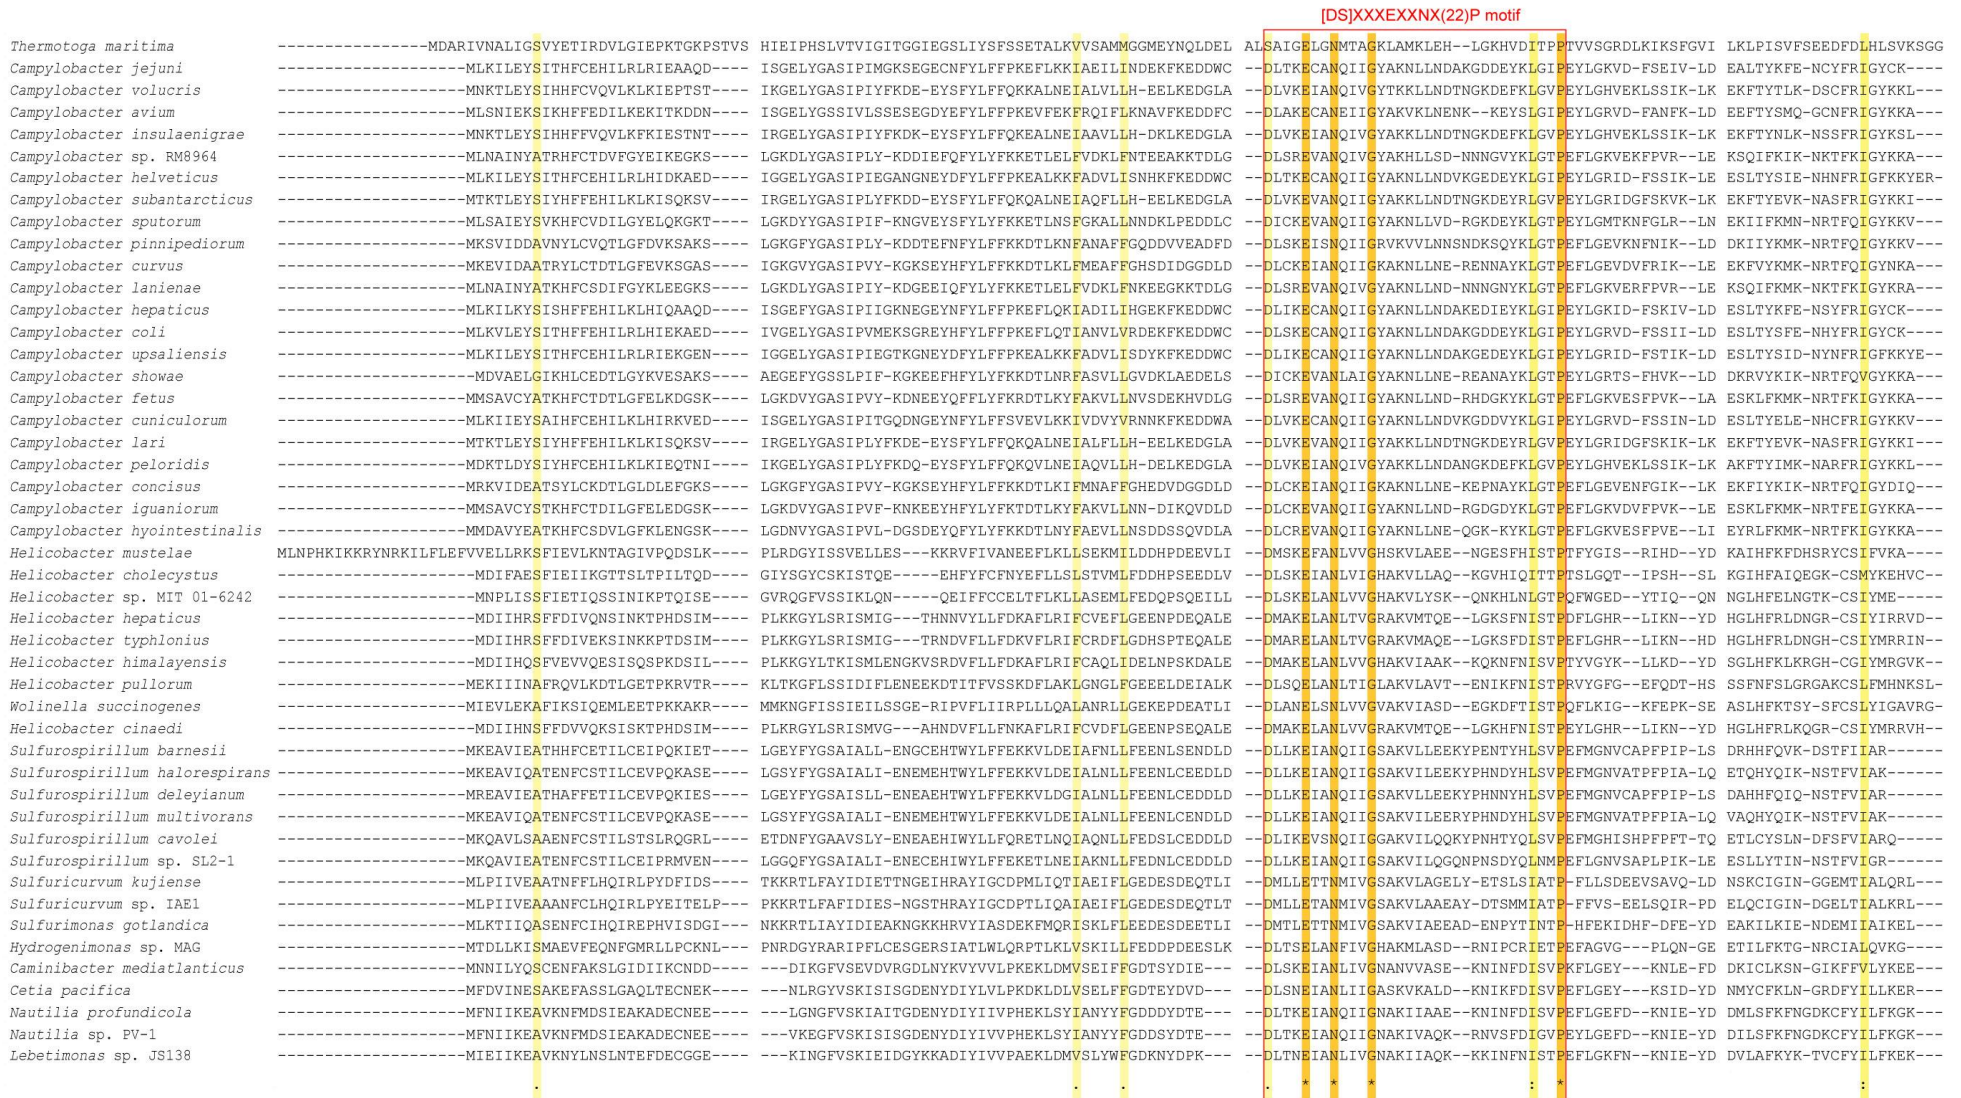

**S2 Fig.** Sequence alignment of potential CheX homologs in *Campylobacterota* species with experimentally confirmed CheX from *Thermotoga maritima* shown on the top.
