# Supplementary material for: The evolutionary path of chemosensory and flagellar macromolecular machines in Campylobacterota
Source: PubMed Central journal article supplement (PMC9321776; doi:10.1371/journal.pgen.1010316), 2022-07-14
Supplement: pgen.1010316.s004.pdf [file pgen.1010316.s004.pdf]

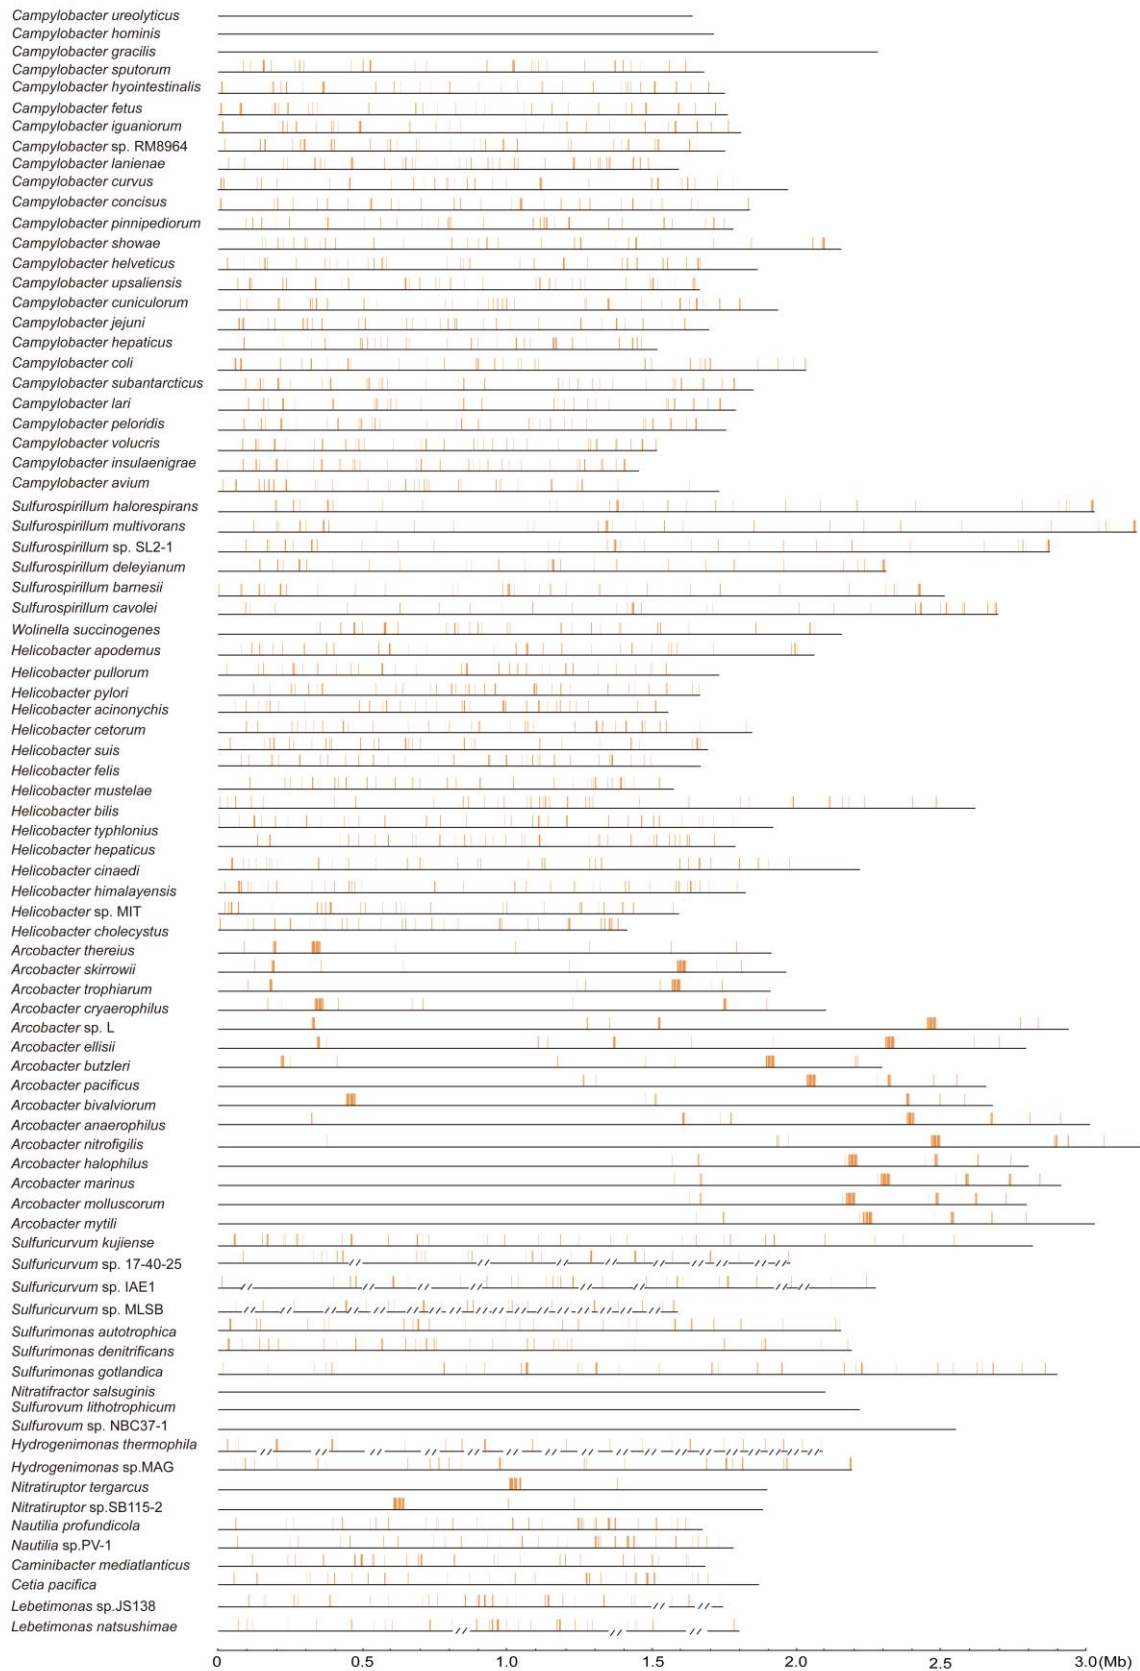

**S4 Fig.** Genomic distribution of flagellar genes in *Campylobacterota* species. The linearized genomes are depicted as scale lines and flagellar genes as the ochre stripes.
