# Supplementary material for: The evolutionary path of chemosensory and flagellar macromolecular machines in Campylobacterota
Source: PubMed Central journal article supplement (PMC9321776; doi:10.1371/journal.pgen.1010316), 2022-07-14
Supplement: pgen.1010316.s005.pdf [file pgen.1010316.s005.pdf]

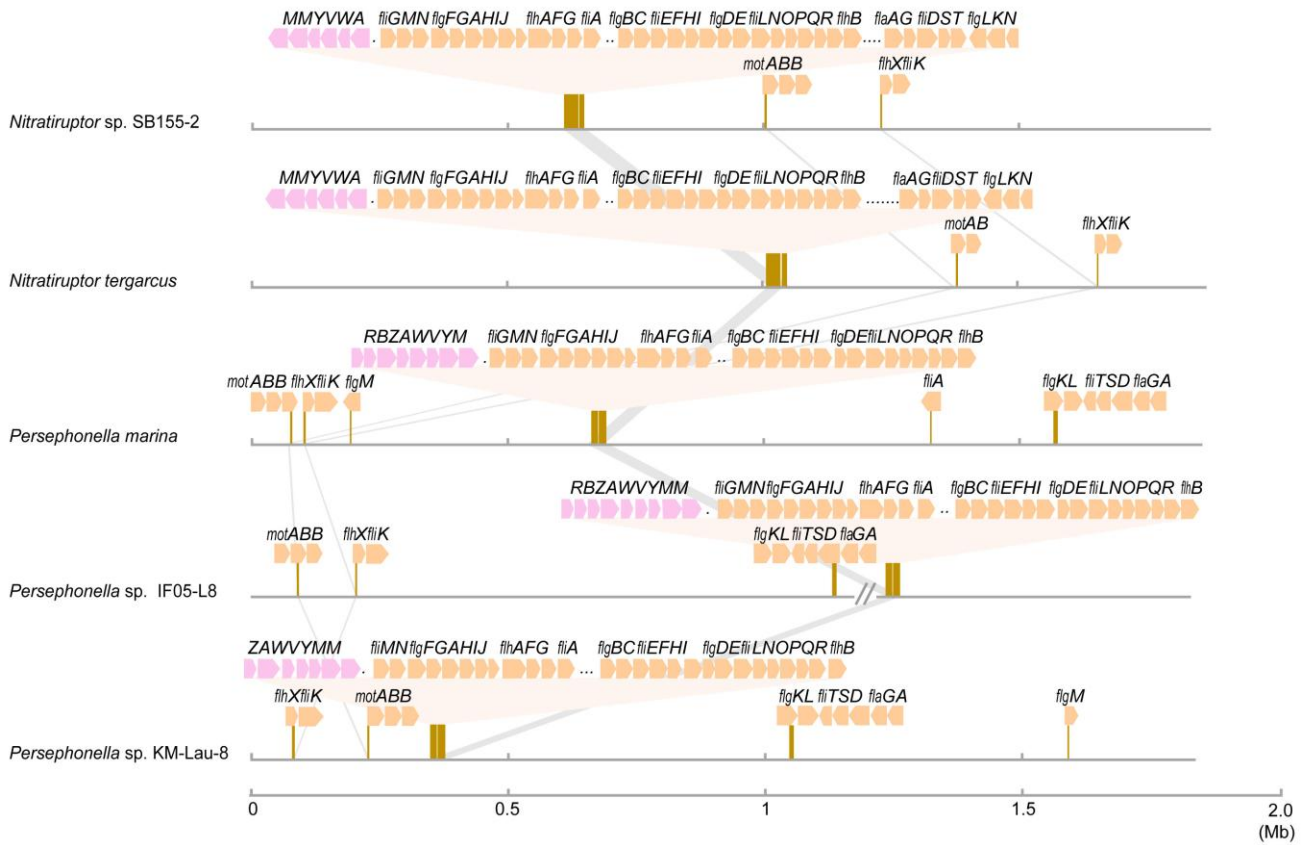

**S5 Fig.** The gene order of F14 chemosensory class and flagellar locus in species of *Nitratiruptor* (*Campylobacterota*) and *Persephonella* (*Aquificota*). Ochre strips represent flagellar genes on the linearized genomes; the order of flagellar (orange arrow) and chemosensory gene (pink arrow) are depicted above; the grey lines link the same gene cluster from different genomes.
