# Supplementary material for: The evolutionary path of chemosensory and flagellar macromolecular machines in Campylobacterota
Source: PubMed Central journal article supplement (PMC9321776; doi:10.1371/journal.pgen.1010316), 2022-07-14
Supplement: pgen.1010316.s007.pdf [file pgen.1010316.s007.pdf]

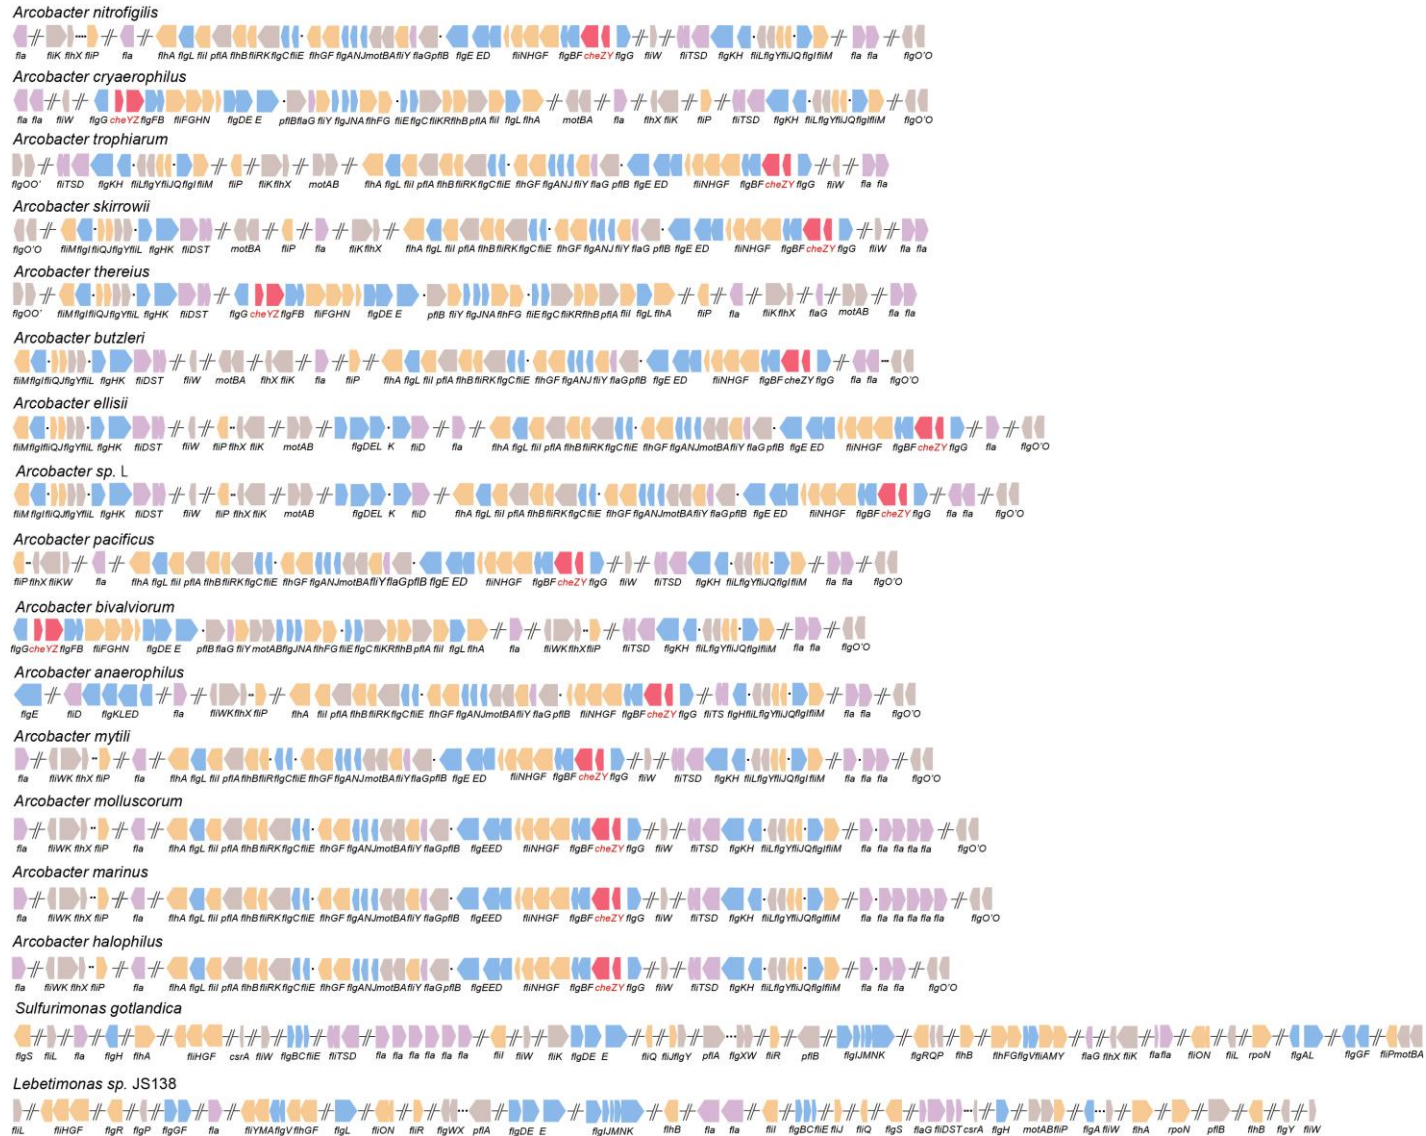

**S7 Fig.** Flagellar gene arrangement of all *Arcobacter* species, compared to *Lebetimonas* sp. JS138 and *Sulfurimonas gotlandica* GD1. The genes are colored by transcriptional order of Class 1 (orange), Class 2 (light blue) and Class 3 (lavender). *cheZ* and *cheY* in the flagellar gene cluster are highlighted in red. Abbreviation: *fla* for Flagellin.
