# Supplementary material for: The evolutionary path of chemosensory and flagellar macromolecular machines in Campylobacterota
Source: PubMed Central journal article supplement (PMC9321776; doi:10.1371/journal.pgen.1010316), 2022-07-14
Supplement: pgen.1010316.s008.pdf [file pgen.1010316.s008.pdf]

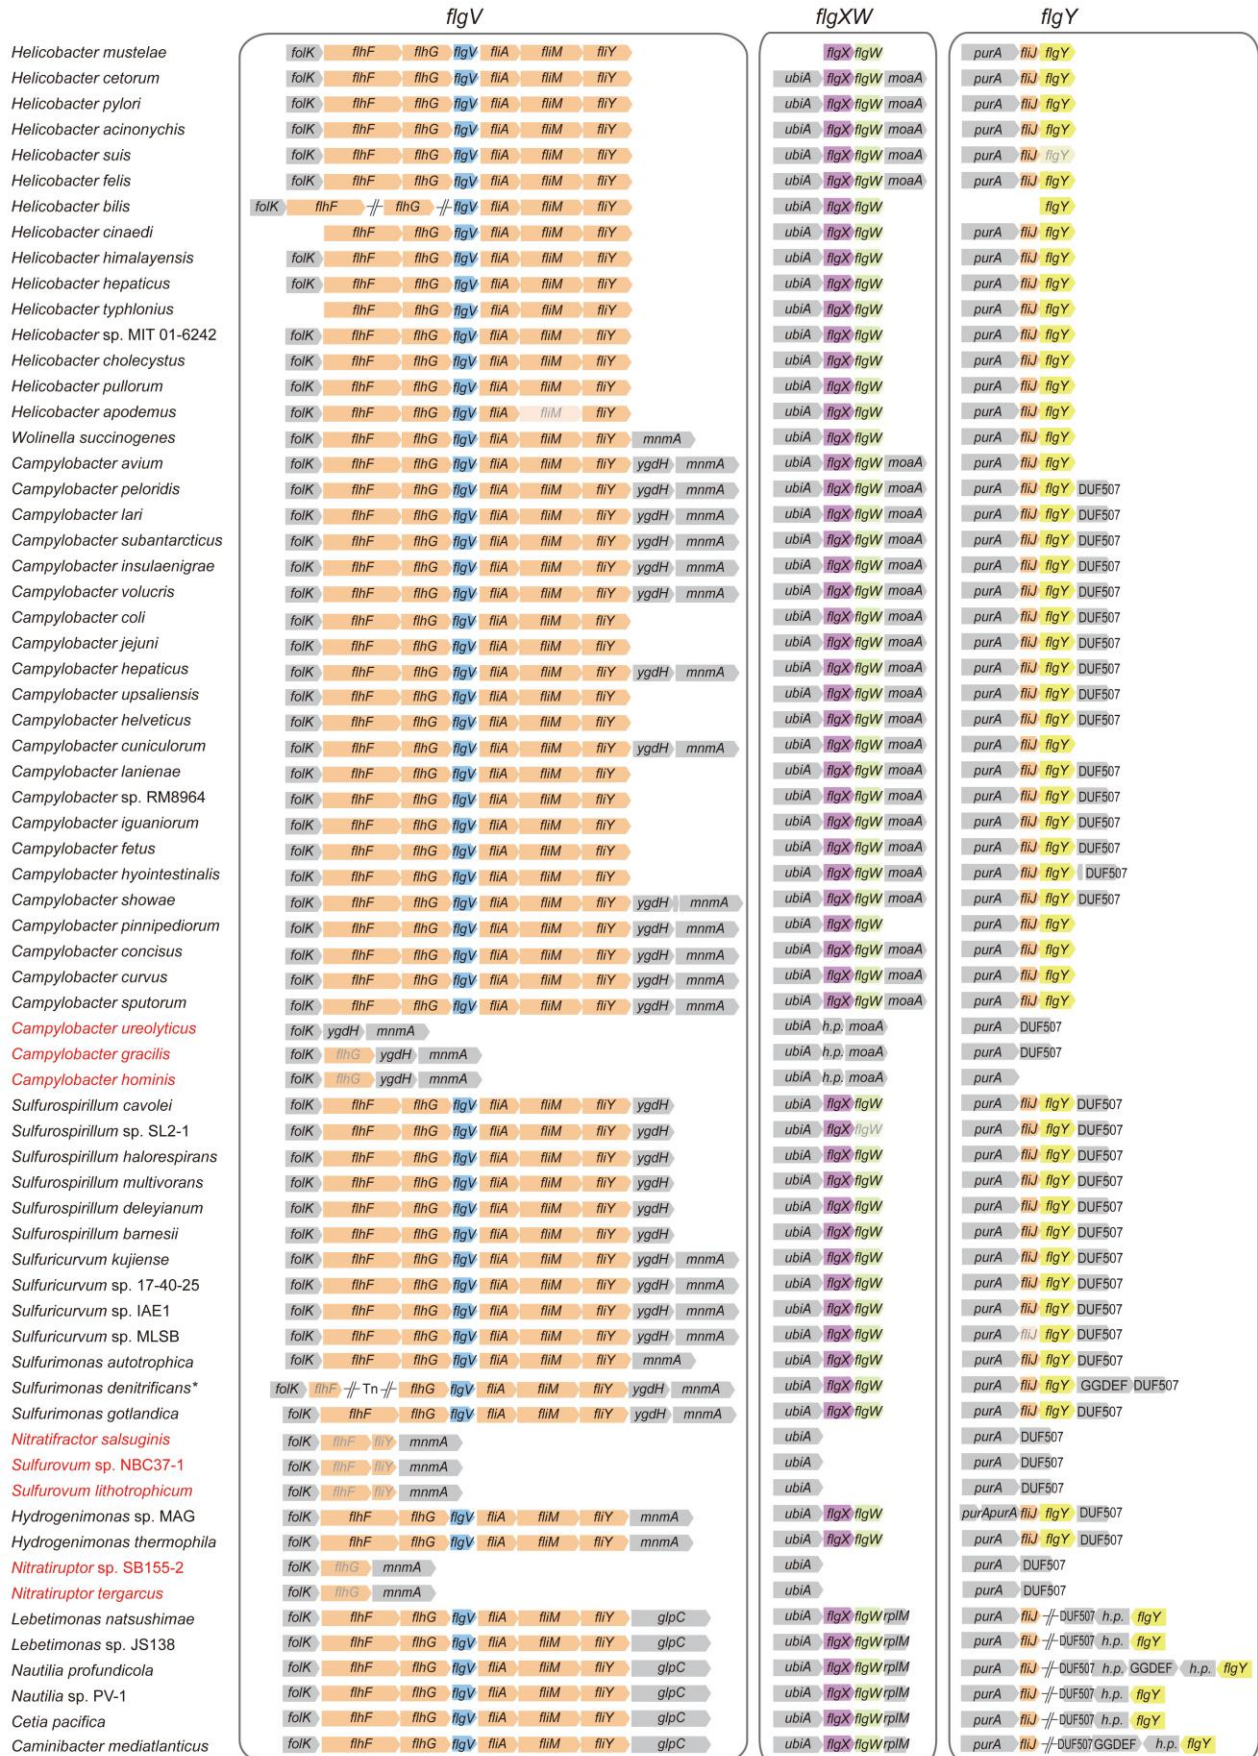

**S8 Fig.** The conserved gene order of *flgV*, *flgX* and *flgY* in *Campylobacterota* genomes. Species highlighted in red are either unflagellated or do not have F3 chemosensory class. *Arcobacter* species that do not have F3 class and FlgVXY are not shown here due to space limitation.
