# Supplementary material for: The evolutionary path of chemosensory and flagellar macromolecular machines in Campylobacterota
Source: PubMed Central journal article supplement (PMC9321776; doi:10.1371/journal.pgen.1010316), 2022-07-14
Supplement: pgen.1010316.s009.pdf [file pgen.1010316.s009.pdf]

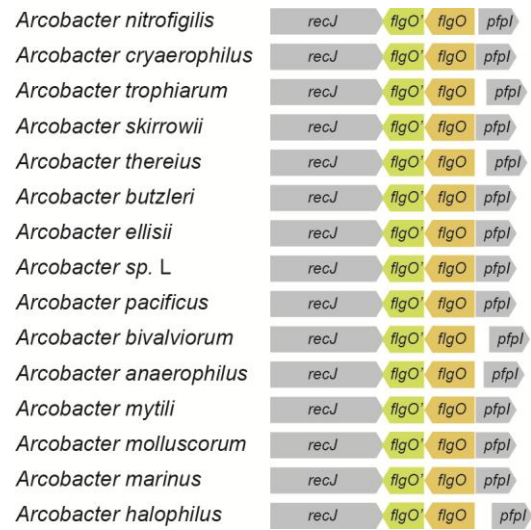

**S9 Fig.** The conserved gene order of *flgO* and its potential paralog *flgO'* in *Arcobacter* genomes.
